# Supplementary material for: Formation of square prism-shaped poly(o-phenylenediamine) fibers triggered by high ionic strength
Source: Royal Society of Chemistry journal article supplement (doi:10.1039/c6ra00204h), 2016-01-01
Supplement: c6ra00204h1.pdf [file c6ra00204h1.pdf]

## **Formation of square prism-shaped poly (o-phenylenediamine) fibers triggered by high ionic strength**

Kunpeng Jiang,<sup>[a]</sup> Shenghua Ma,<sup>[a]</sup> Ying Zhang,<sup>[a]</sup> Xiaojun Han<sup>[a]\*</sup>

[a] State Key Laboratory of Urban Water Resource and Environment, School of Chemical Engineering and Technology, Harbin Institute of Technology, 92 West Da-Zhi Street, Harbin, 150001, China

E-mail: hanxiaojun@hit.edu.cn

## Supporting Information

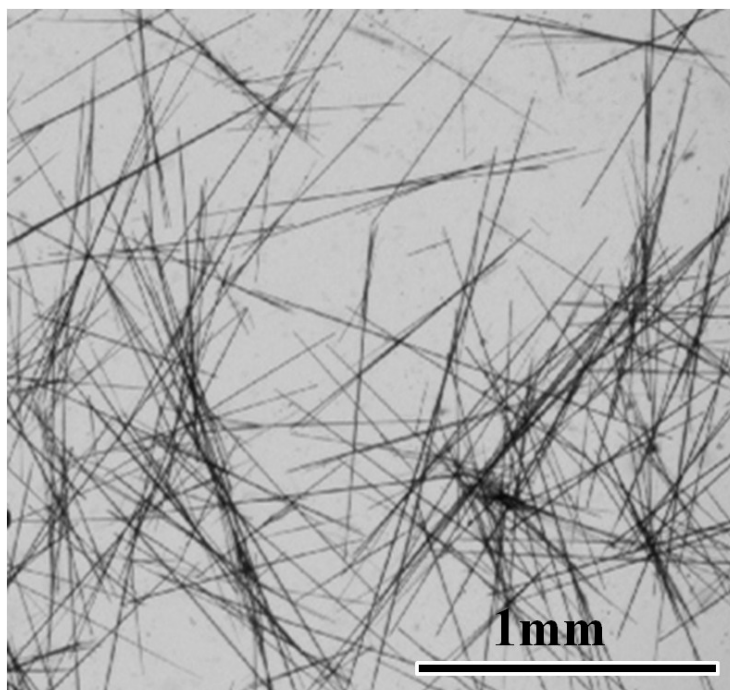

Figure S1 The optical microscopy image of sample 1.

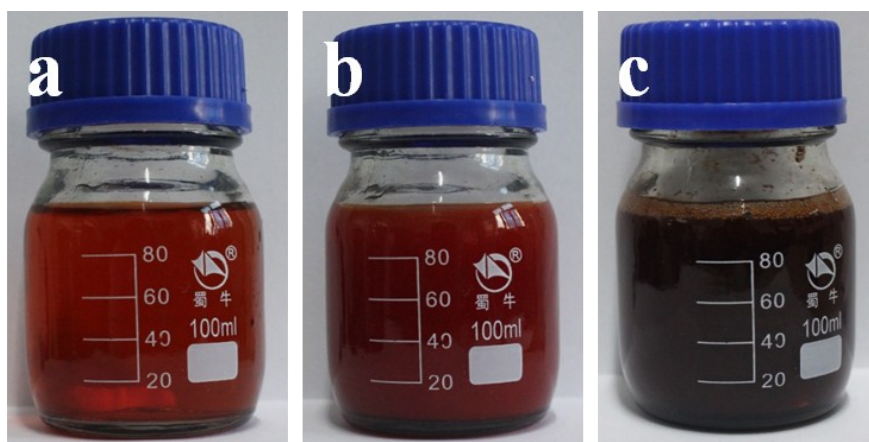

Figure S2 The photograph of sample 1 synthesized in large scale.

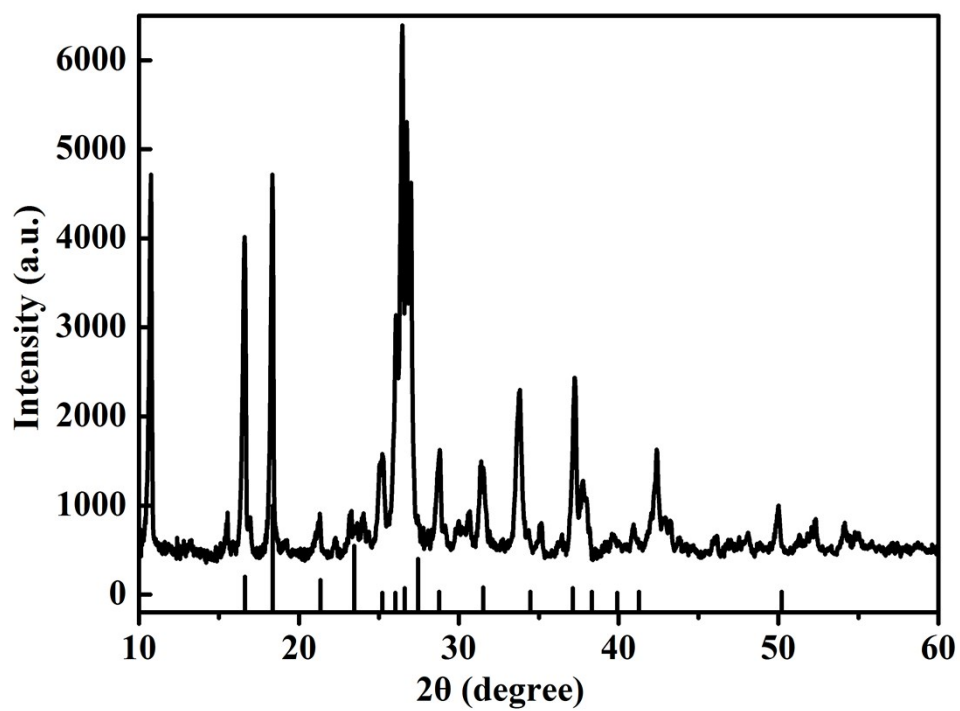

Figure S3. XRD spectra of sample 1.

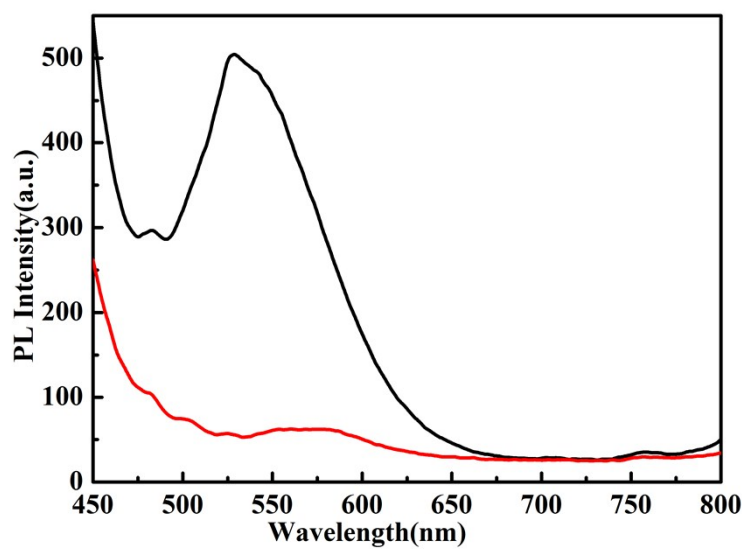

Figure S4. Fluorescence spectra of sample 1 before (red curve) and after (black curve) treating with 0.1 M NaOH.
